# Supplementary material for: Anti-Microbial Activity of Aliphatic Alcohols from Chinese Black Cardamom (Amomum tsao-ko) against Mycobacterium tuberculosis H37Rv
Source: MDPI journal article supplement (doi:10.3390/plants12010034), 2022-12-21

Supporting information

# **Anti-microbial Activity of Aliphatic Alcohols from Chinese Black Cardamom (*Amomum tsao-ko*) against *Mycobacterium tuberculosis* H37Rv**

So Young Lee <sup>1,†</sup>, Gauri S. Shetye <sup>2,†</sup>, So-Ri Son <sup>1</sup>, Larry L. Klein <sup>2</sup>, Jeffrey K. Yoshihara <sup>2</sup>, Scott G. Franzblau <sup>2</sup>, Sanghyun Cho <sup>b,\*</sup>, Dae Sik Jang <sup>1,3,\*</sup>

## Contents of supporting information

Figure S1. DART-MS spectrum of compound **1**.

Figure S2. The IR spectrum of compound **1**.

Figure S3. The  $^1\text{H}$ -NMR (500 MHz,  $\text{CDCl}_3$ ) spectrum of compound **1**.

Figure S4. The  $^{13}\text{C}$ -NMR (125 MHz,  $\text{CDCl}_3$ ) spectrum of compound **1**.

Figure S5. The HSQC spectrum of compound **1** in  $\text{CDCl}_3$ .

Figure S6. The COSY spectrum of compound **1** in  $\text{CDCl}_3$ .

Figure S7. The HMBC spectrum of compound **1** in  $\text{CDCl}_3$ .

Figure S8. DART-MS spectrum of compound **6**.

Figure S9. The IR spectrum of compound **6**.

Figure S10. The  $^1\text{H}$ -NMR (500 MHz,  $\text{CDCl}_3$ ) spectrum of compound **6**.

Figure S11. The  $^{13}\text{C}$ -NMR (125 MHz,  $\text{CDCl}_3$ ) spectrum of compound **6**.

Figure S1. DART-MS spectrum of compound 1

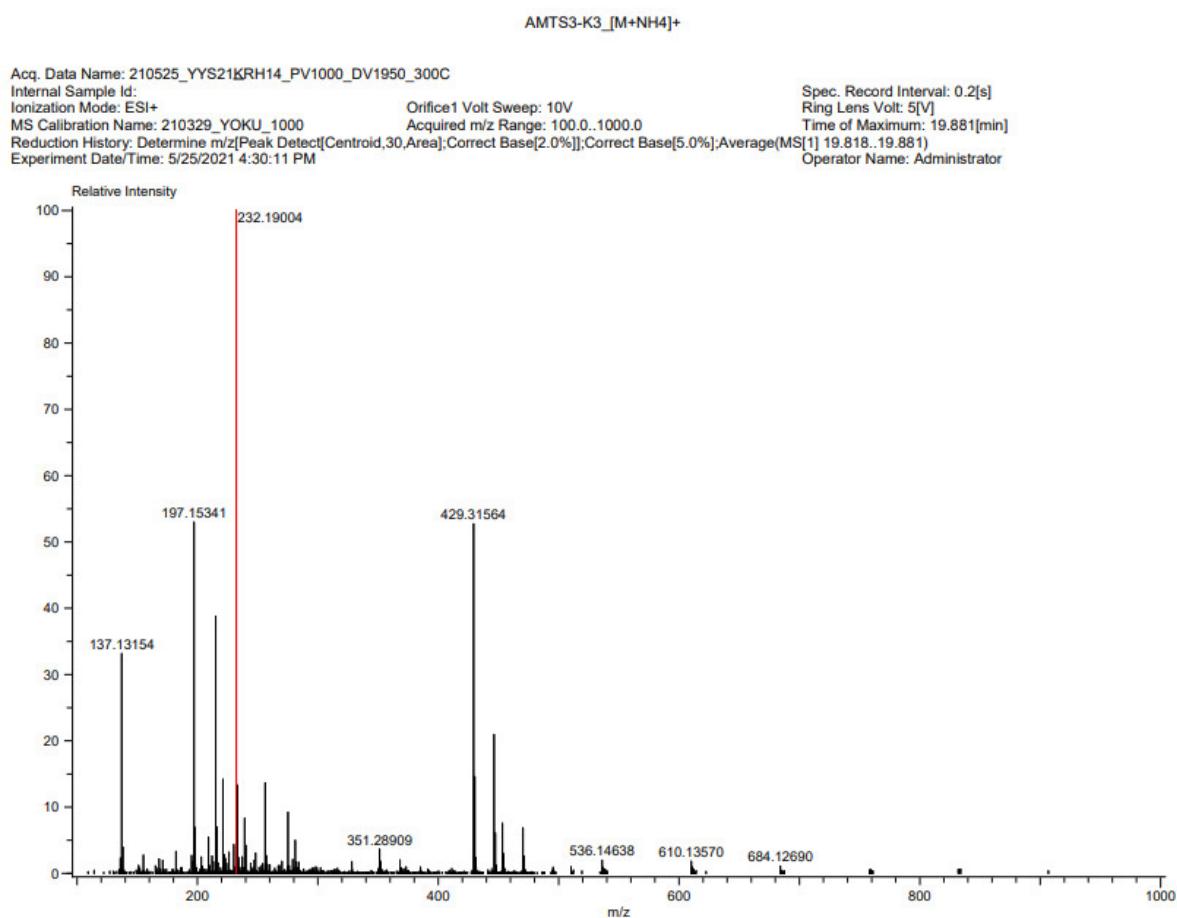

Figure S2. The IR spectrum of compound 1.

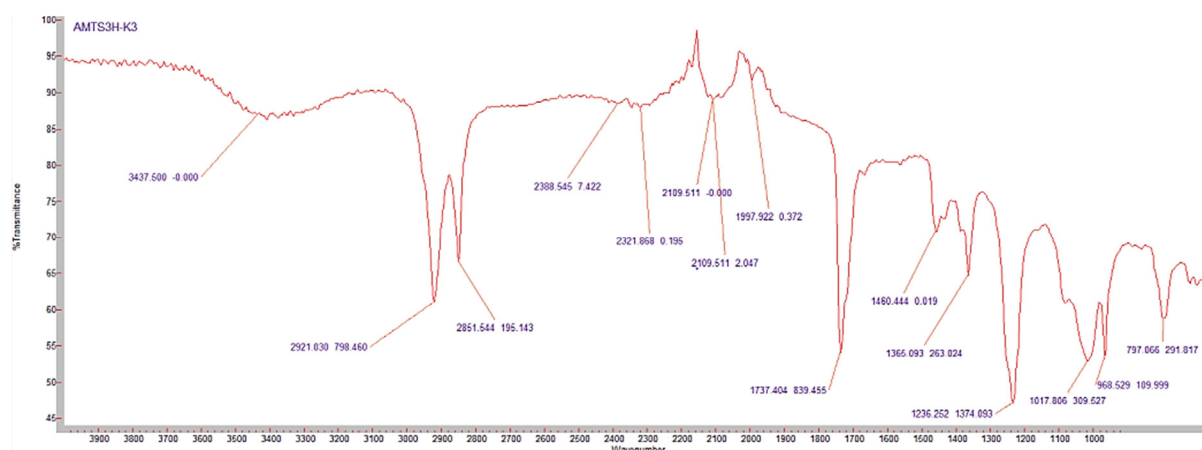

Figure S3. The  $^1\text{H}$ -NMR (500 MHz,  $\text{CDCl}_3$ ) spectrum of compound 1

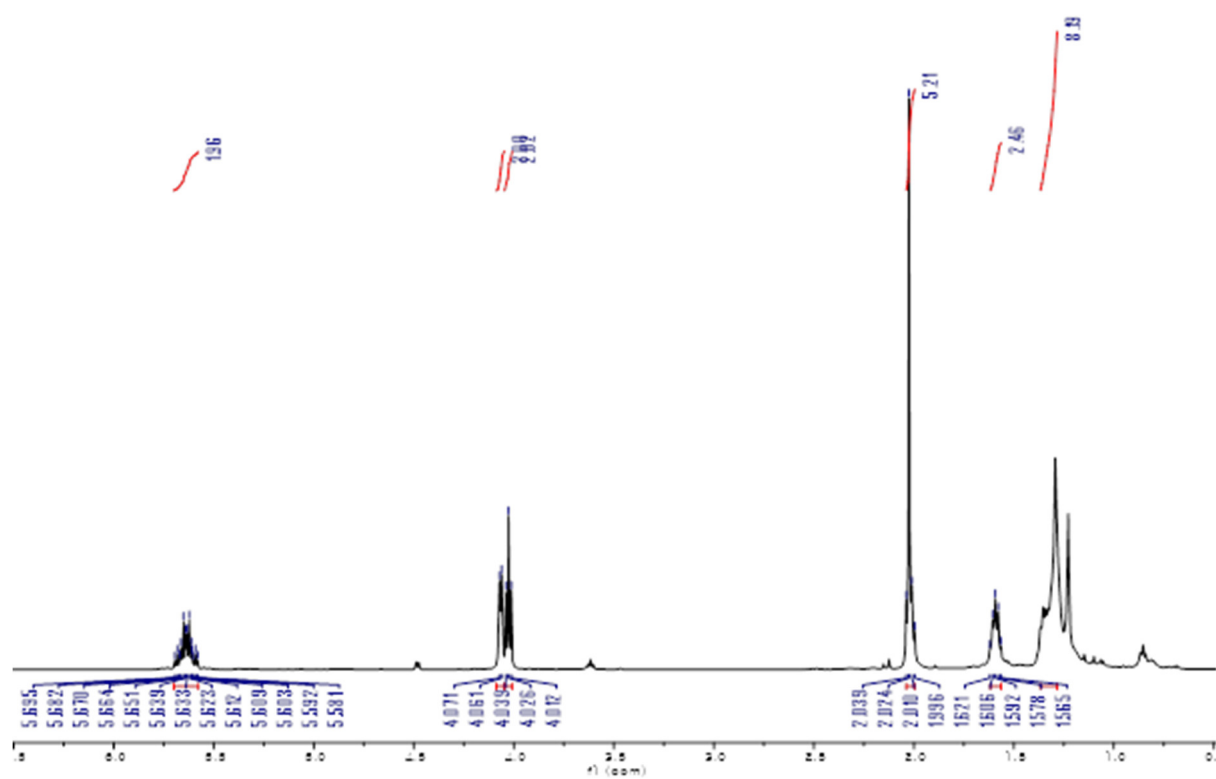

Figure S4 The  $^{13}\text{C}$ -NMR (125 MHz,  $\text{CDCl}_3$ ) spectrum of compound **1**.

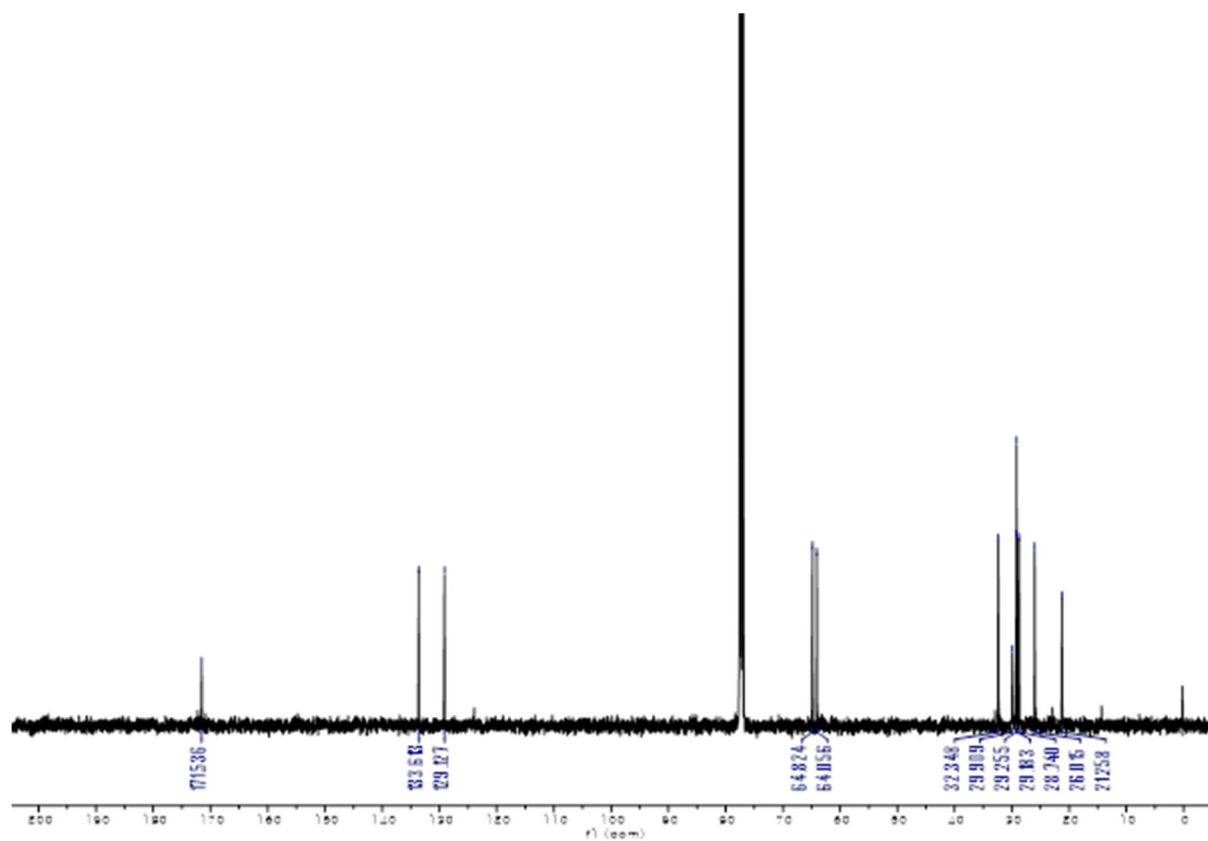

Figure S5. The HSQC spectrum of compound **1** in CDCl<sub>3</sub>.

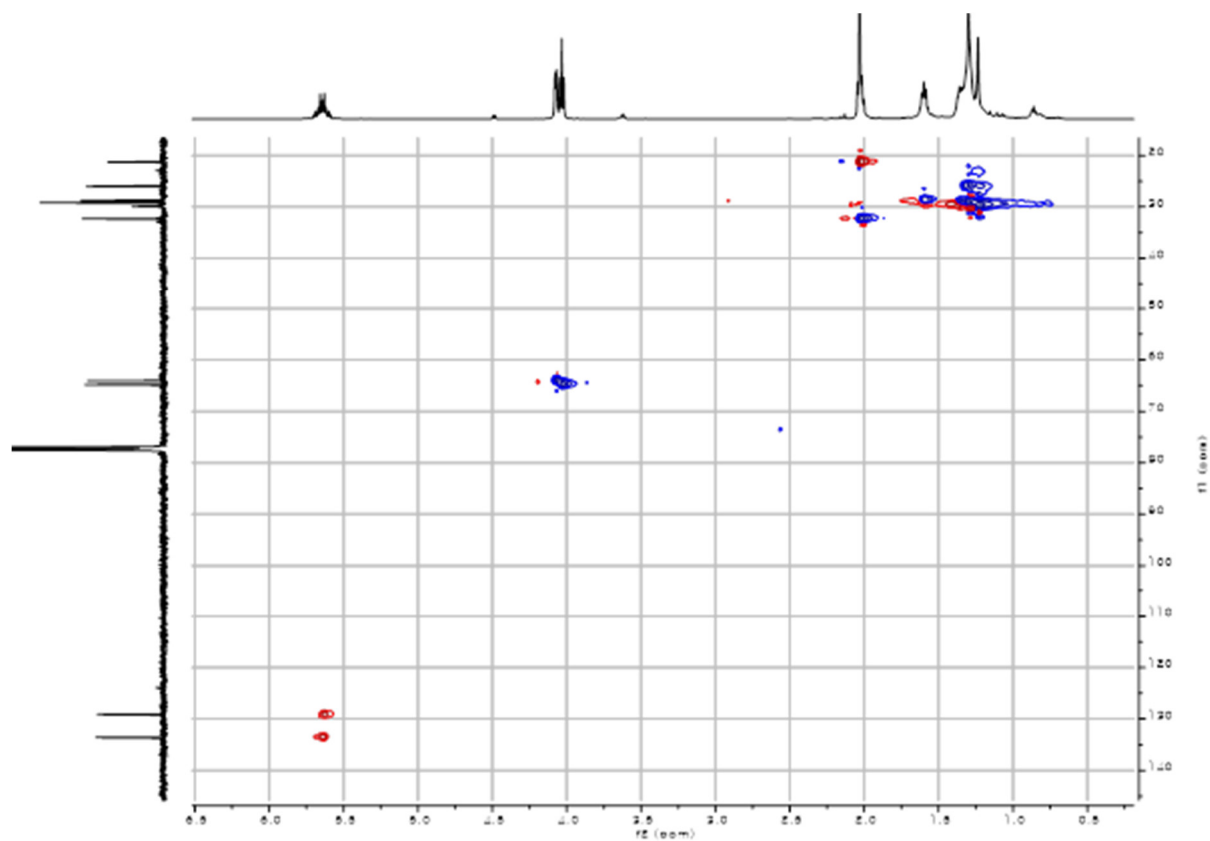

Figure S6. The COSY spectrum of compound 1 in CDCl<sub>3</sub>.

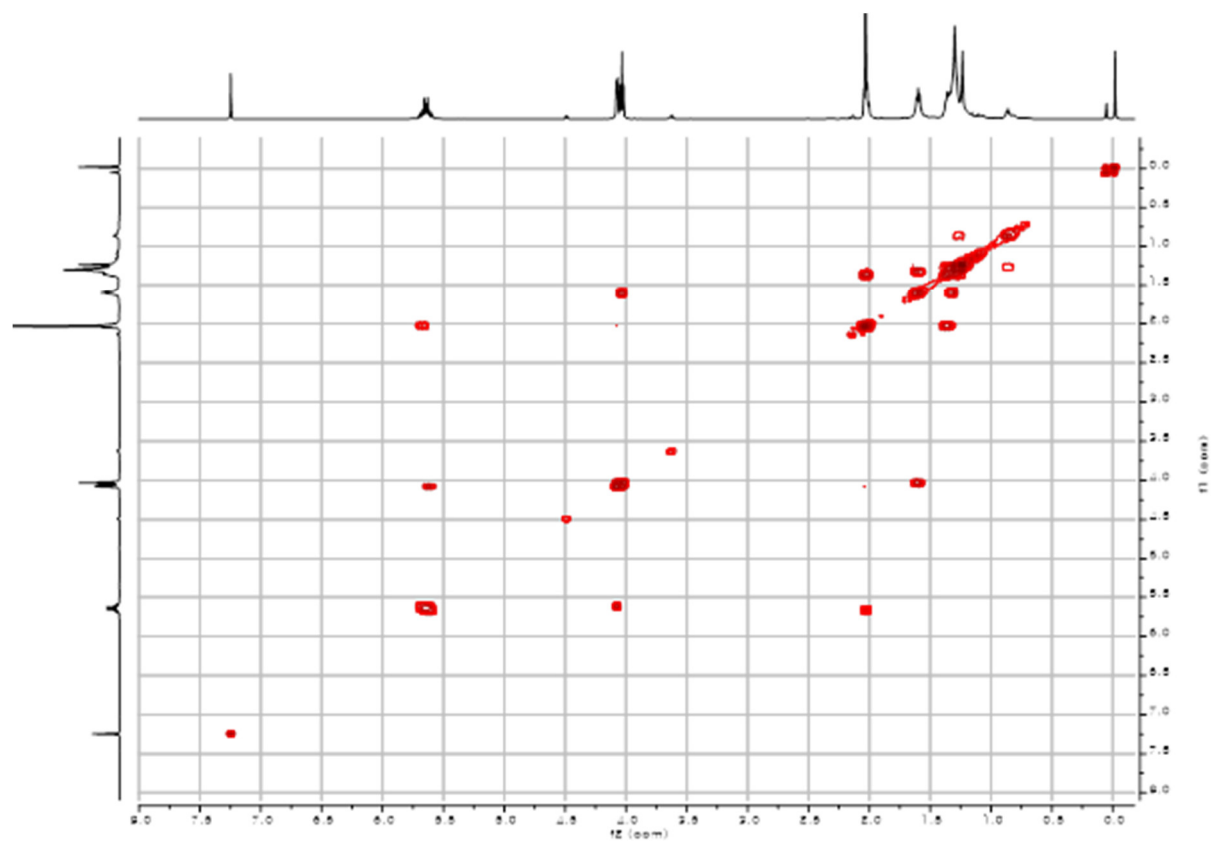



Figure S7. The HMBC spectrum of compound **1** in CDCl<sub>3</sub>.

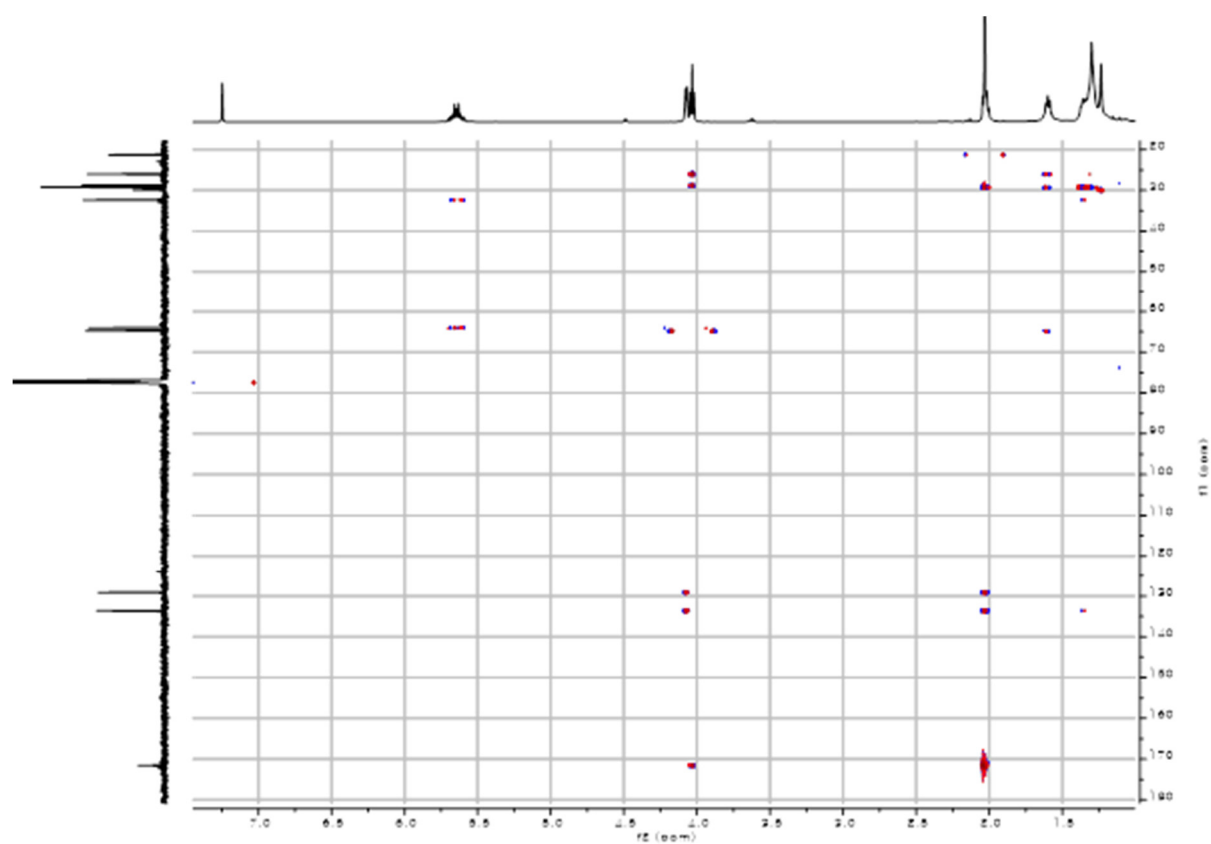

Figure S8. DART-MS spectrum of compound 6.

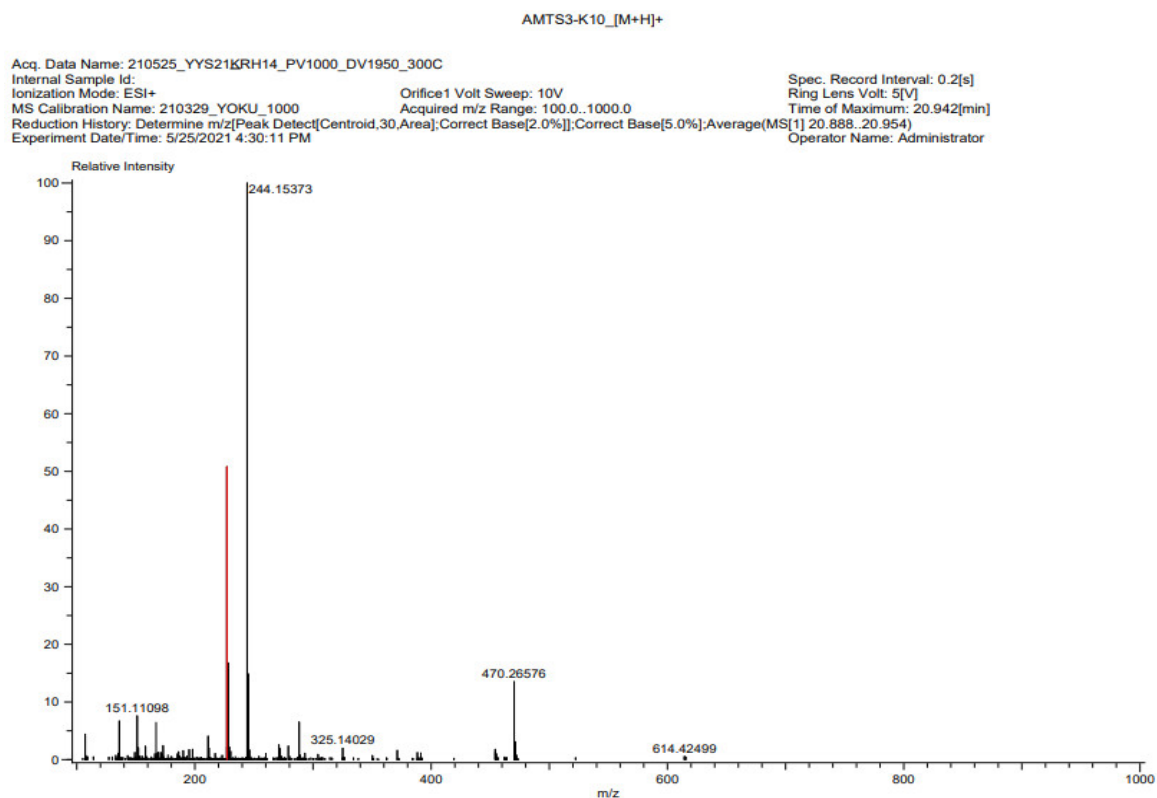

Figure S9. The IR spectrum of compound 6.

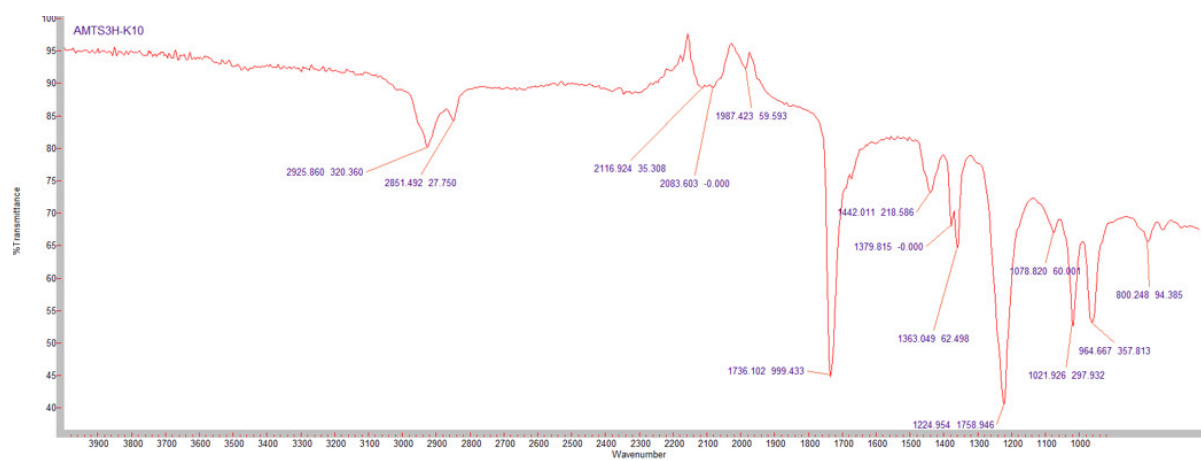

Figure S10. The  $^1\text{H}$ -NMR (500 MHz,  $\text{CDCl}_3$ ) spectrum of compound **6**.

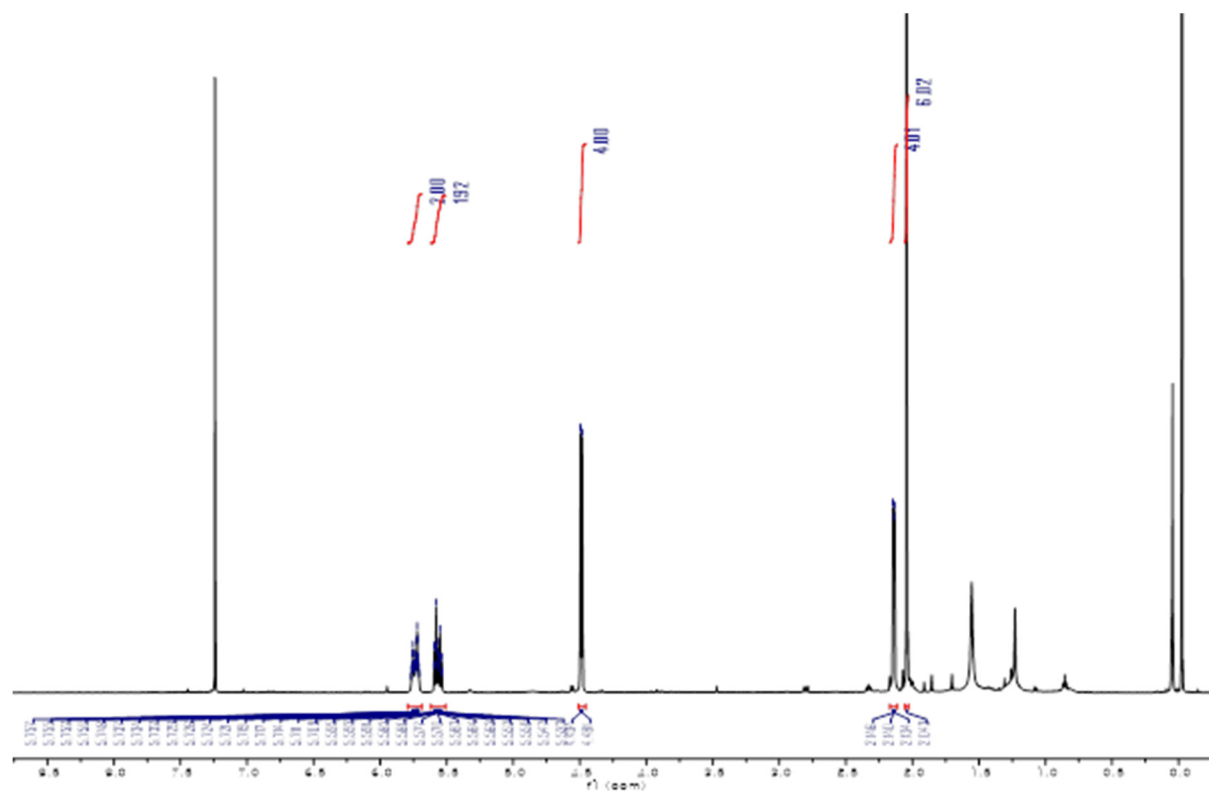

Figure S11. The  $^{13}\text{C}$ -NMR (125 MHz,  $\text{CDCl}_3$ ) spectrum of compound **6**.

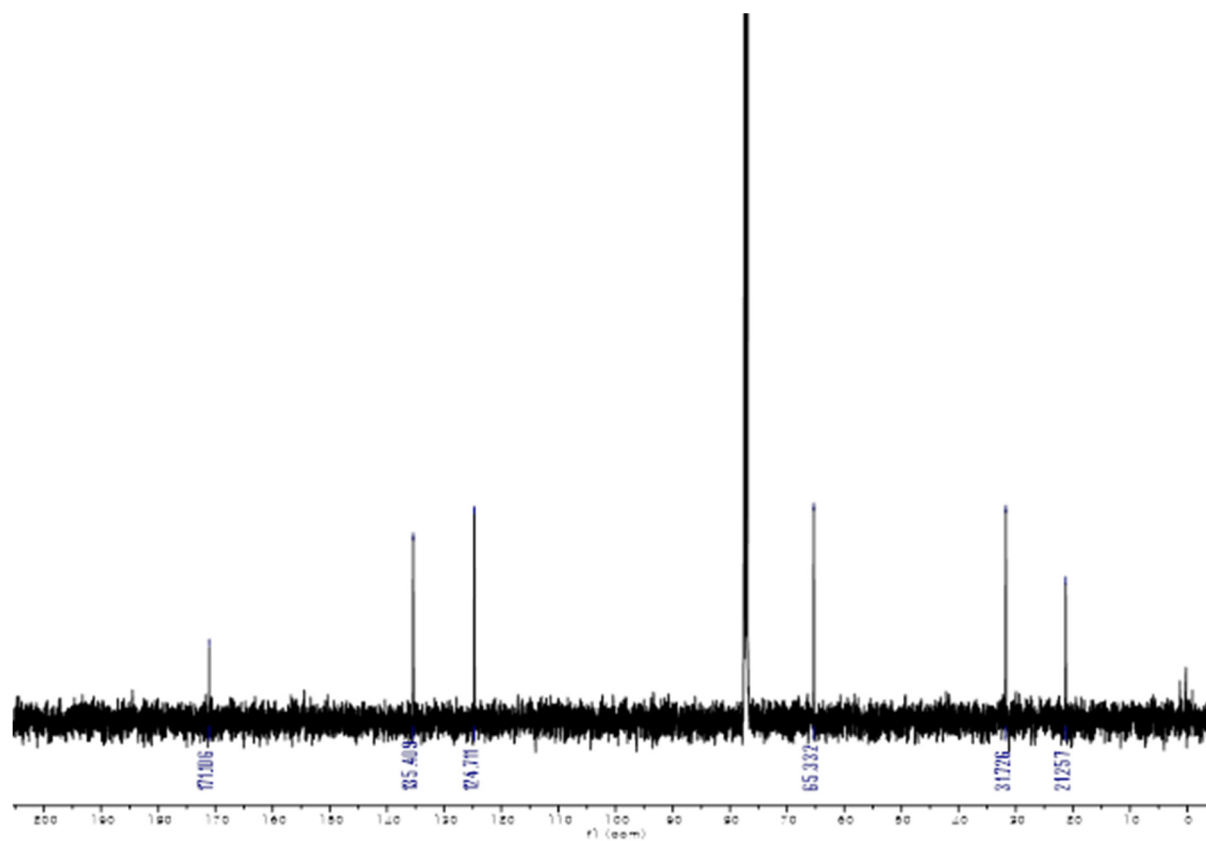

Supplement: s1 [file s1]
